# Supplementary material
Source: PubMed Central journal article supplement (PMC3792797)
Supplement: NIHMS512013-supplement-Suppl_Table_1.pdf [file NIHMS512013-supplement-Suppl_Table_1.pdf]

**Supplementary Table 1. Serological, Inflammatory, and Genetic Biomarkers Prevalence Stratified by IBD Status.**

|                                    | <b>Biomarkers</b> | <b>Non-IBD (n=620)</b> | <b>IBD (n=900)</b> | <b>CD (n=572)</b> | <b>UC (n=328)</b> | <b>IBD vs. non-IBD</b> | <b>CD vs. UC</b> |
|------------------------------------|-------------------|------------------------|--------------------|-------------------|-------------------|------------------------|------------------|
| <b>Serological antibodies</b>      | <b>ASCA-IgA</b>   | 9%                     | 36.3%              | 52.6%             | 7.9%              | p<0.0001               | p<0.0001         |
|                                    | <b>ASCA-IgG</b>   | 11.8%                  | 34.3%              | 48.4%             | 9.8%              | p<0.0001               | p<0.0001         |
|                                    | <b>ANCA</b>       | 6.3%                   | 38.2%              | 24.1%             | 62.8%             | p<0.0001               | p<0.0001         |
|                                    | <b>pANCA2</b>     | 3.2%                   | 35.8%              | 21.0%             | 61.6%             | p<0.0001               | p<0.0001         |
|                                    | <b>OmpC</b>       | 15.2%                  | 31.8%              | 37.4%             | 22.0%             | p<0.0001               | p<0.0001         |
|                                    | <b>CBir1</b>      | 16.0%                  | 31.4%              | 39.5%             | 17.4%             | p<0.0001               | p<0.0001         |
|                                    | <b>A4-Fla2</b>    | 11.9%                  | 34.0%              | 44.4%             | 15.9%             | p<0.0001               | p<0.0001         |
|                                    | <b>FlaX</b>       | 11.6%                  | 34.2%              | 44.4%             | 16.5%             | p<0.0001               | p<0.0001         |
| <b>Inflammatory burden markers</b> | <b>VEGF</b>       | 18.2%                  | 29.7%              | 30.6%             | 28.0%             | p<0.0001               | p=0.289          |
|                                    | <b>CRP</b>        | 17.3%                  | 30.3%              | 33.9%             | 24.1%             | p<0.0001               | p<0.0001         |
|                                    | <b>SAA</b>        | 13.1%                  | 33.2%              | 37.6%             | 25.6%             | p<0.0001               | p=0.00131        |
|                                    | <b>ICAM-1</b>     | 18.5%                  | 29.6%              | 30.4%             | 28.0%             | p<0.0001               | p=0.0938         |
|                                    | <b>VCAM-1</b>     | 19.0%                  | 29.2%              | 28.0%             | 31.4%             | p=0.00189              | p=0.404          |
| <b>Genetic markers</b>             | <b>ATG16L1</b>    | 23.5%                  | 31.4%              | 32.5%             | 29.6%             | p<0.001                | p=0.3594         |
|                                    | <b>NKX2-3</b>     | 19.7%                  | 29.0%              | 28.8%             | 29.3%             | p<0.0001               | p=0.8875         |
|                                    | <b>ECM1</b>       | 15.3%                  | 15.9%              | 15.4%             | 16.8%             | p=0.7642               | p=0.5839         |
|                                    | <b>STAT3</b>      | 36.8%                  | 35.0%              | 34.6%             | 35.7%             | p=0.4795               | p=0.7818         |

A patient was considered positive if their biomarker measure was equal or above the third quartile for that marker's measures. For genetic markers (*ATG16L1*, *NKX2-3*, *ECM1*, and *STAT3*), patients were considered positive if they were homozygous for the risk allele.
