# Supplementary material
Source: PubMed Central journal article supplement (PMC3792797)
Supplement: NIHMS512013-supplement-Suppl_Table_2.pdf [file NIHMS512013-supplement-Suppl_Table_2.pdf]

**Supplementary Table 2. Comparison of the Prevalence of Positive Genetic Markers in IBD and Non-IBD Patients.**

| <b>Number of Positive<br/>Genetic Markers</b> | <b>non-IBD</b> | <b>IBD</b> |                                     |
|-----------------------------------------------|----------------|------------|-------------------------------------|
| <2                                            | 140 (77%)      | 278 (69%)  |                                     |
| ≥2                                            | 480 (23%)      | 622 (31%)  | p=0.0004, OR: 1.53, 95%CI: 1.2-1.95 |
