# Supplementary material
Source: PubMed Central journal article supplement (PMC3792797)
Supplement: NIHMS512013-supplement-Suppl_Table_3.pdf [file NIHMS512013-supplement-Suppl_Table_3.pdf]

**Supplementary Table 3. Biomarkers Used to Define IBD vs. Non-IBD Patients, Ranked by Contribution.**

| <b>Marker</b> | <b>Contribution</b> | <b>Proportion</b> |
|---------------|---------------------|-------------------|
| ANCA          | 4.569               | 0.124             |
| ASCA-IgA      | 4.323               | 0.117             |
| ASCA-IgG      | 3.844               | 0.104             |
| pANCA         | 3.745               | 0.101             |
| FlaX          | 3.671               | 0.099             |
| SAA           | 2.955               | 0.080             |
| A4-Fla2       | 2.881               | 0.078             |
| ICAM-1        | 2.230               | 0.060             |
| OmpC          | 2.023               | 0.055             |
| CBir1         | 1.844               | 0.050             |
| VCAM-1        | 1.836               | 0.050             |
| CRP           | 1.351               | 0.037             |
| NKX2-3        | 0.647               | 0.018             |
| ATG16L1       | 0.412               | 0.011             |
| STAT3         | 0.234               | 0.006             |
| ECM1          | 0.205               | 0.006             |
| VEGF          | 0.193               | 0.005             |
| <b>Total</b>  | <b>36.963</b>       | <b>1.000</b>      |
